# Supplementary material for: The Characteristics of Cognitive Impairment in ALS Patients Depend on the Lateralization of Motor Damage
Source: PubMed Central journal article supplement (PMC7563934; doi:10.3390/brainsci10090650), 2020-09-19
Supplement: brainsci-10-00650-s001.pdf [file brainsci-10-00650-s001.pdf]

**Table S1.** Number of patients who underwent different neuropsychological tests grouped by site/site of onset.

| Site/site of onset      | Bulbar onset<br><i>n</i> (%) <sup>a</sup> | Spinal right-side onset<br><i>n</i> (%) <sup>a</sup> | Spinal left-side onset<br><i>n</i> (%) <sup>a</sup> | Spinal bilateral onset<br><i>n</i> (%) <sup>a</sup> | Total<br><i>n</i> (%) <sup>c</sup> |                       |
|-------------------------|-------------------------------------------|------------------------------------------------------|-----------------------------------------------------|-----------------------------------------------------|------------------------------------|-----------------------|
| Total                   | 218 (35.8)                                | 174 (28.6)                                           | 105 (17.2)                                          | 112 (18.4)                                          | 609 (100.0)                        |                       |
| Neuropsychological Test |                                           |                                                      |                                                     |                                                     |                                    | <i>p</i> <sup>*</sup> |
| MMSE                    | 216 (35.8)                                | 171 (28.4)                                           | 104 (17.2)                                          | 112 (18.6)                                          | 603 (99.0)                         | 0.999                 |
| Letter Fluency Test     | 201 (34.4)                                | 171 (29.3)                                           | 104 (17.8)                                          | 108 (18.5)                                          | 584 (95.9)                         | 0.965                 |
| Category fluency test   | 151 (33.2)                                | 137 (30.1)                                           | 83 (18.2)                                           | 84 (18.5)                                           | 455 (74.7)                         | 0.833                 |
| FAB                     | 179 (35.4)                                | 142 (28.1)                                           | 88 (17.4)                                           | 96 (19.0)                                           | 505 (82.9)                         | 0.993                 |
| Digit Span FW           | 188 (34.9)                                | 153 (28.4)                                           | 97 (18.0)                                           | 100 (18.6)                                          | 538 (88.3)                         | 0.983                 |
| Digit Span BW           | 148 (33.5)                                | 127 (28.7)                                           | 82 (18.6)                                           | 85 (19.2)                                           | 442 (72.6)                         | 0.864                 |
| TMT-A                   | 191 (35.4)                                | 156 (28.9)                                           | 95 (17.6)                                           | 98 (18.1)                                           | 540 (88.7)                         | 0.997                 |
| TMT-B                   | 191 (35.4)                                | 156 (28.9)                                           | 95 (17.6)                                           | 98 (18.1)                                           | 540 (88.7)                         | 0.997                 |
| TMT-B-A                 | 191 (35.4)                                | 156 (28.9)                                           | 95 (17.6)                                           | 98 (18.1)                                           | 540 (88.7)                         | 0.997                 |
| RAVLT-ir                | 89 (31.7)                                 | 73 (26.0)                                            | 59 (21.0)                                           | 60 (21.4)                                           | 281 (46.1)                         | 0.289                 |
| RAVLT-dr                | 89 (31.7)                                 | 73 (26.0)                                            | 59 (21.0)                                           | 60 (21.4)                                           | 281 (46.1)                         | 0.289                 |
| BSRT-ir                 | 90 (31.1)                                 | 80 (27.7)                                            | 59 (20.4)                                           | 60 (20.8)                                           | 289 (47.5)                         | 0.400                 |
| BSRT-dr                 | 84 (30.1)                                 | 77 (27.6)                                            | 60 (21.5)                                           | 58 (20.8)                                           | 279 (45.8)                         | 0.228                 |
| ROCFT-copy              | 150 (35.2)                                | 120 (28.2)                                           | 79 (18.5)                                           | 77 (18.1)                                           | 426 (70.0)                         | 0.962                 |
| ROCFT-dr                | 150 (35.5)                                | 118 (28.0)                                           | 77 (18.2)                                           | 77 (18.2)                                           | 422 (69.3)                         | 0.980                 |
| CPM47                   | 205 (35.7)                                | 164 (28.6)                                           | 100 (17.4)                                          | 105 (18.3)                                          | 574 (94.3)                         | 0.999                 |
| WCST                    | 64 (34.2)                                 | 58 (31.0)                                            | 31 (16.6)                                           | 34 (18.2)                                           | 187 (30.7)                         | 0.933                 |

<sup>a</sup> Raw percentage; <sup>c</sup> Column percentage of patients who underwent the specific test compared to the whole study population; *p*<sup>\*</sup> Chi-square test between single test population vs. whole study population.

**Table S2.** Comparison between PARALS population (2010-2018 period) and Turin ALS Centre who underwent neuropsychological evaluation.

|                    | PARALS<br><i>n</i> = 1332 | Study group<br><i>n</i> = 609 | <i>p</i> |
|--------------------|---------------------------|-------------------------------|----------|
| Age at onset       | 69.9 (61.7–76.1)          | 69.0 (60.0–74.0)              | 0.082 *  |
| Education          | 7.5 (5.0–11.5)            | 8.0 (5.0–12.0)                | 0.360 *  |
| Sex                |                           |                               | 0.805 #  |
| Male               | 748 (56.2)                | 346 (56.8)                    |          |
| Female             | 584 (43.8)                | 263 (43.2)                    |          |
| Site of Onset      |                           |                               |          |
| Bulbar Onset       | 427 (32.1)                | 218 (35.8)                    | 0.273 ## |
| Upper Limbs Onset  | 363 (27.3)                | 174 (28.6)                    |          |
| Lower Limbs Onset  | 511 (38.4)                | 217 (35.6)                    |          |
| Other/undetermined | 31 (2.3)                  | 0 (0.0)                       |          |

\* Mann-Whiney U test; # Fisher's exact test; ## Chi-square test.

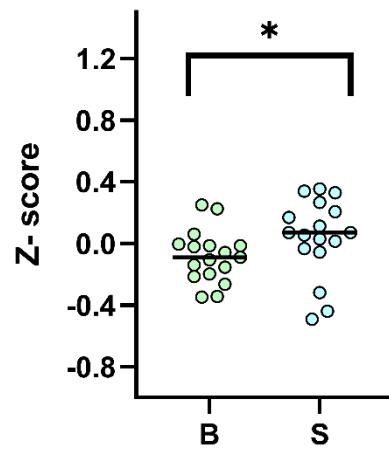

**Figure S1.** Median z-scores for all neuropsychological tests subdivided by site of onset (bulbar vs. spinal onset) \* Mann-Whitney U test (with Bonferroni's correction)  $p < 0.05$ .
